# Supplementary material for: Second-harmonic electron paramagnetic resonance spectroscopy and imaging reveal metallic lithium depositions in Li-ion batteries
Source: Copernicus journal article supplement (doi:10.5194/mr-5-87-2024), 2024-06-25

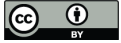

*Supplement of*

## **Second-harmonic electron paramagnetic resonance spectroscopy and imaging reveal metallic lithium depositions in Li-ion batteries**

**Charles-E. Dutoit et al.**

*Correspondence to:* Charles-E. Dutoit ([charles.dutoit@univ-lille.fr](mailto:charles.dutoit@univ-lille.fr))

The copyright of individual parts of the supplement might differ from the article licence.

**Supplementary Figure S1:** 1<sup>st</sup> harmonic X-band EPR spectrum of graphite anode recorded after the first half lithiation (electrode potential of 86mV). The red line represents the simulation using a single dysonian function and shows that the experimental spectrum is correctly reproduced suggesting only one contribution.

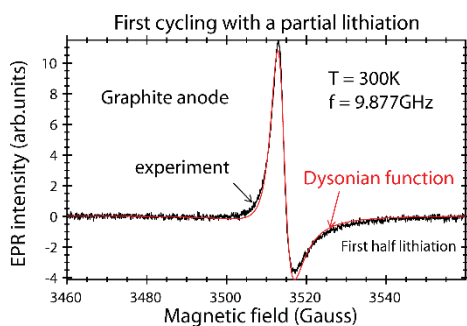

**Supplementary Figure S2:** **a** Voltage and current of the symmetric Li-metal electrochemical cell as a function of the cycling time. **b** Set of X-band EPR spectra of the cell recorded before cycling (i) and after the short circuit (ii). Both EPR signals (ii) were obtained using the 1<sup>st</sup> and the 2<sup>nd</sup> harmonic detection scheme respectively.

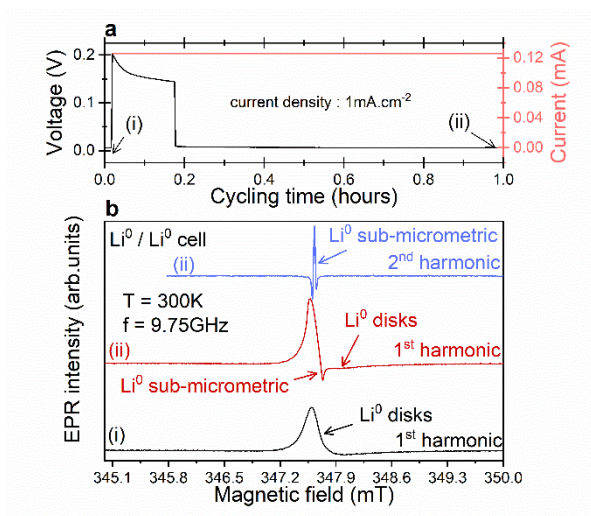

Supplement: Supplementary file [file mr-5-87-2024-supplement.pdf]
